# Supplementary material for: Occurrence of Pesticide Residues in Spanish Honey Measured by QuEChERS Method Followed by Liquid and Gas Chromatography–Tandem Mass Spectrometry
Source: MDPI journal article supplement (doi:10.3390/foods10102262), 2021-09-24
Supplement: s1 [file s1]

**Table S1.** List of Compounds Included in the GC-MS/MS method together with their Retention Times (RT), quantification and confirmation transitions, and collision energies.

| Compound                         | RT (min) | Quantification transition | Collision energy (V) | Confirmation transition | Collision energy (V) |
|----------------------------------|----------|---------------------------|----------------------|-------------------------|----------------------|
| Isoproturon artifact             | 4.613    | 146.0 -> 128.0            | 10                   | 161.0 -> 146.0          | 10                   |
| Dichlorvos                       | 4.675    | 185.0 -> 93.0             | 10                   | 185.0 -> 109.0          | 15                   |
| Trichlorfon (artifact)           | 4.675    | 185.0 -> 93.0             | 10                   | 185.0 -> 109.0          | 15                   |
| Disulfoton sulfoxide             | 5.098    | 97.0 -> 65.0              | 15                   | 212.0 -> 125.0          | 20                   |
| 2,4,6-Trichlorophenol            | 5.290    | 196.0 -> 97.0             | 35                   | 196.0 -> 132.0          | 15                   |
| Biphenyl                         | 5.443    | 154.0 -> 115.0            | 30                   | 154.0 -> 128.0          | 25                   |
| 3,5-Dichloroaniline              | 5.555    | 161.0 -> 99.0             | 20                   | 161.0 -> 126.0          | 15                   |
| Mevinphos                        | 5.605    | 192.0 -> 127.0            | 10                   | 192.0 -> 164.0          | 5                    |
| Butylate                         | 5.636    | 156.0 -> 57.0             | 10                   | 146.0 -> 57.0           | 5                    |
| Chlormephos                      | 5.729    | 234.0 -> 65.0             | 25                   | 234.0 -> 121.0          | 5                    |
| Propham                          | 5.782    | 179.0 -> 93.0             | 15                   | 179.0 -> 137.0          | 5                    |
| Pebulate                         | 5.817    | 161.0 -> 128.0            | 5                    | 203.0 -> 57.0           | 0                    |
| Etridiazole                      | 5.843    | 211.0 -> 183.0            | 10                   | 211.0 -> 140.0          | 25                   |
| Phthalimide (Folpet deg)         | 5.886    | 147.0 -> 76.0             | 25                   | 147.0 -> 103.0          | 5                    |
| Tetrahydrophthalimide            | 5.908    | 151.0 -> 79.0             | 20                   | 151.0 -> 122.0          | 5                    |
| Methacrifos                      | 6.056    | 240.0 -> 180.0            | 5                    | 208.0 -> 93.0           | 10                   |
| Chloroneb                        | 6.152    | 191.0 -> 113.0            | 15                   | 191.0 -> 141.0          | 10                   |
| 2-Phenylphenol                   | 6.266    | 169.0 -> 141.0            | 15                   | 169.0 -> 115.0          | 25                   |
| Molinate                         | 6.390    | 187.0 -> 126.0            | 5                    | 187.0 -> 55.0           | 20                   |
| Heptenophos                      | 6.605    | 250.0 -> 124.0            | 5                    | 215.0 -> 89.0           | 15                   |
| DEET (Diethyl-m-toluamide, N,N-) | 6.625    | 190.0 -> 145.0            | 20                   | 190.0 -> 117.0          | 25                   |
| Chlorfenprop methyl              | 6.731    | 196.0 -> 165.0            | 15                   | 196.0 -> 137.0          | 25                   |
| Propachlor                       | 6.889    | 176.0 -> 57.0             | 5                    | 196.0 -> 120.0          | 10                   |
| Tecnazene                        | 6.902    | 261.0 -> 203.0            | 10                   | 215.0 -> 179.0          | 10                   |
| Diphenylamine                    | 6.974    | 169.0 -> 167.0            | 20                   | 169.0 -> 66.0           | 25                   |
| Ethoprophos                      | 7.014    | 158.0 -> 97.0             | 15                   | 200.0 -> 97.0           | 20                   |
| Chlorpropham                     | 7.112    | 213.0 -> 171.0            | 5                    | 213.0 -> 127.0          | 10                   |
| Atrazine desisopropyl            | 7.137    | 173.0 -> 44.0             | 10                   | 158.0 -> 91.0           | 5                    |
| Atrazine desethyl                | 7.216    | 172.0 -> 94.0             | 15                   | 172.0 -> 104.0          | 15                   |
| Trifluralin                      | 7.235    | 306.0 -> 264.0            | 5                    | 290.0 -> 248.0          | 5                    |
| Benfluralin                      | 7.269    | 292.0 -> 160.0            | 25                   | 292.0 -> 264.0          | 5                    |
| Sulfotep                         | 7.364    | 322.0 -> 146.0            | 25                   | 322.0 -> 174.0          | 15                   |
| Terbutylazine-desethyl           | 7.368    | 186.0 -> 83.0             | 20                   | 186.0 -> 145.0          | 10                   |
| Cadusafos                        | 7.415    | 159.0 -> 97.0             | 15                   | 213.0 -> 89.0           | 10                   |
| Phorate                          | 7.495    | 260.0 -> 75.0             | 10                   | 231.0 -> 129.0          | 25                   |
| Hexachlorocyclohexane-alfa       | 7.643    | 217.0 -> 181.0            | 5                    | 219.0 -> 109.0          | 5                    |
| Thiometon                        | 7.674    | 88.0 -> 60.0              | 5                    | 246.0 -> 88.0           | 0                    |
| Prometon                         | 7.783    | 225.0 -> 168.0            | 10                   | 225.0 -> 183.0          | 10                   |

| Compound                      | RT<br>(min) | Quantification<br>transition | Collision<br>energy<br>(V) | Confirmation<br>transition | Collision<br>energy<br>(V) |
|-------------------------------|-------------|------------------------------|----------------------------|----------------------------|----------------------------|
| Hexachlorobenzene             | 7.788       | 284.0 -> 214.0               | 30                         | 284.0 -> 249.0             | 15                         |
| Ethoxyquin                    | 7.793       | 202.0 -> 174.0               | 15                         | 202.0 -> 159.0             | 35                         |
| Simazine                      | 7.816       | 201.0 -> 44.0                | 15                         | 201.0 -> 138.0             | 10                         |
| Dichloran                     | 7.820       | 206.0 -> 176.0               | 10                         | 206.0 -> 148.0             | 25                         |
| Carbofuran                    | 7.833       | 164.0 -> 103.0               | 25                         | 164.0 -> 131.0             | 15                         |
| Pentachloroanisole            | 7.834       | 280.0 -> 237.0               | 25                         | 280.0 -> 265.0             | 10                         |
| Atrazine                      | 7.888       | 215.0 -> 58.0                | 10                         | 215.0 -> 138.0             | 15                         |
| Propazine                     | 7.946       | 214.0 -> 172.0               | 10                         | 229.0 -> 58.0              | 10                         |
| Terbumeton                    | 7.961       | 225.0 -> 169.0               | 5                          | 225.0 -> 154.0             | 15                         |
| Clomazone                     | 7.981       | 204.0 -> 107.0               | 20                         | 204.0 -> 78.0              | 30                         |
| DMST                          | 8.049       | 214.0 -> 45.0                | 10                         | 214.0 -> 106.0             | 20                         |
| Hexachlorocyclohexane-beta    | 8.054       | 219.0 -> 183.0               | 5                          | 219.0 -> 109.0             | 40                         |
| Profluralin                   | 8.097       | 318.0 -> 199.0               | 15                         | 318.0 -> 55.0              | 10                         |
| Terbutylazine                 | 8.118       | 214.0 -> 104.0               | 20                         | 214.0 -> 132.0             | 10                         |
| Terbufos                      | 8.151       | 231.0 -> 129.0               | 20                         | 231.0 -> 97.0              | 30                         |
| Lindane-gamma                 | 8.152       | 219.0 -> 183.0               | 5                          | 219.0 -> 109.0             | 40                         |
| Cyanophos                     | 8.156       | 243.0 -> 109.0               | 10                         | 243.0 -> 116.0             | 8                          |
| Quintozene                    | 8.229       | 295.0 -> 237.0               | 20                         | 295.0 -> 265.0             | 5                          |
| Fonofos                       | 8.247       | 246.0 -> 109.0               | 15                         | 246.0 -> 137.0             | 5                          |
| Diazinon                      | 8.269       | 304.0 -> 179.0               | 15                         | 304.0 -> 137.0             | 40                         |
| Pyrimethanil                  | 8.290       | 198.0 -> 118.0               | 35                         | 198.0 -> 158.0             | 20                         |
| Phosphamidon I                | 8.327       | 264.0 -> 127.0               | 15                         | 264.0 -> 72.0              | 10                         |
| Tefluthrin                    | 8.405       | 177.0 -> 127.0               | 20                         | 177.0 -> 87.0              | 30                         |
| Disulfoton                    | 8.417       | 88.0 -> 60.0                 | 5                          | 274.0 -> 88.0              | 10                         |
| Paraoxon methyl               | 8.426       | 230.0 -> 106.0               | 15                         | 230.0 -> 136.0             | 5                          |
| Terbacil                      | 8.440       | 161.0 -> 88.0                | 20                         | 117.0 -> 76.0              | 5                          |
| Isazophos                     | 8.510       | 257.0 -> 162.0               | 5                          | 257.0 -> 161.0             | 10                         |
| Hexachlorocyclohexane-delta   | 8.523       | 217.0 -> 181.0               | 5                          | 219.0 -> 109.0             | 5                          |
| Triallate                     | 8.560       | 268.0 -> 184.0               | 20                         | 268.0 -> 226.0             | 10                         |
| Chlorothalonil                | 8.607       | 264.0 -> 168.0               | 25                         | 266.0 -> 133.0             | 40                         |
| Hexachlorocyclohexane-epsilon | 8.701       | 217.0 -> 181.0               | 5                          | 219.0 -> 109.0             | 5                          |
| Pirimicarb                    | 8.716       | 238.0 -> 166.0               | 10                         | 166.0 -> 96.0              | 15                         |
| Fenfluthrin                   | 8.741       | 181.0 -> 161.0               | 20                         | 163.0 -> 127.0             | 5                          |
| Formothion                    | 8.765       | 170.0 -> 93.0                | 5                          | 170.0 -> 63.0              | 25                         |
| Ethiofencarb                  | 8.776       | 168.0 -> 107.0               | 10                         | 168.0 -> 79.0              | 20                         |
| Pirimicarb desmethyl          | 8.859       | 224.0 -> 152.0               | 15                         | 224.0 -> 96.0              | 20                         |
| Pentachloraniline             | 8.922       | 263.0 -> 192.0               | 20                         | 265.0 -> 194.0             | 20                         |
| Phosphamidon II               | 8.939       | 264.0 -> 127.0               | 15                         | 264.0 -> 72.0              | 10                         |
| Dichlofenthion                | 8.961       | 279.0 -> 223.0               | 15                         | 279.0 -> 205.0             | 30                         |
| Propanil                      | 8.966       | 161.0 -> 99.0                | 30                         | 161.0 -> 126.0             | 20                         |
| Metribuzin                    | 9.000       | 198.0 -> 82.0                | 15                         | 198.0 -> 110.0             | 10                         |

| Compound                   | RT<br>(min) | Quantification<br>transition | Collision<br>energy<br>(V) | Confirmation<br>transition | Collision<br>energy<br>(V) |
|----------------------------|-------------|------------------------------|----------------------------|----------------------------|----------------------------|
| Dimethenamide              | 9.015       | 230.0 -> 154.1               | 10                         | 230.0 -> 111.0             | 25                         |
| Malaoxon                   | 9.065       | 127.0 -> 99.0                | 5                          | 195.0 -> 125.0             | 10                         |
| Spiroxamine isomer I       | 9.071       | 100.0 -> 72.0                | 5                          | 198.0 -> 126.0             | 5                          |
| Acetochlor                 | 9.074       | 223.0 -> 132.0               | 20                         | 223.0 -> 147.0             | 5                          |
| Vinclozolin                | 9.110       | 212.0 -> 172.0               | 15                         | 212.0 -> 145.0             | 25                         |
| Chlorpyrifos-methyl        | 9.141       | 286.0 -> 93.0                | 20                         | 286.0 -> 271.0             | 15                         |
| Parathion Methyl           | 9.142       | 263.0 -> 109.0               | 10                         | 263.0 -> 79.0              | 30                         |
| Fipronil desulfinyl        | 9.215       | 333.0 -> 231.0               | 30                         | 333.0 -> 281.0             | 15                         |
| Isoproturon                | 9.226       | 206.0 -> 72.0                | 20                         | 206.0 -> 146.0             | 15                         |
| Tolclofos Methyl           | 9.229       | 265.0 -> 93.0                | 25                         | 265.0 -> 220.0             | 25                         |
| Ametryn                    | 9.230       | 227.0 -> 170.0               | 5                          | 227.0 -> 212.0             | 10                         |
| N-desethylpirimifos methyl | 9.239       | 277.0 -> 166.0               | 20                         | 277.0 -> 125.0             | 30                         |
| Alachlor                   | 9.247       | 237.0 -> 160.0               | 5                          | 269.0 -> 160.0             | 5                          |
| Prometryn                  | 9.276       | 241.0 -> 184.0               | 10                         | 241.0 -> 58.0              | 10                         |
| Heptachlor                 | 9.333       | 272.0 -> 237.0               | 15                         | 237.0 -> 143.0             | 35                         |
| Fenthion oxon              | 9.345       | 262.0 -> 247.0               | 10                         | 262.0 -> 217.0             | 15                         |
| Fenchlorphos               | 9.384       | 285.0 -> 240.0               | 30                         | 285.0 -> 93.0              | 25                         |
| Prosulfocarb               | 9.392       | 251.0 -> 128.0               | 5                          | 251.0 -> 86.0              | 10                         |
| Fenpropidin                | 9.454       | 273.0 -> 98.0                | 5                          | 273.0 -> 70.0              | 5                          |
| Terbutryn                  | 9.512       | 241.0 -> 170.0               | 15                         | 241.0 -> 185.0             | 10                         |
| Spiroxamine isomer II      | 9.526       | 100.0 -> 72.0                | 5                          | 198.0 -> 126.0             | 5                          |
| Pirimiphos Methyl          | 9.572       | 290.0 -> 125.0               | 20                         | 290.0 -> 151.0             | 15                         |
| Fenitrothion               | 9.585       | 277.0 -> 109.0               | 15                         | 260.0 -> 125.0             | 10                         |
| Ethofumesate               | 9.607       | 286.0 -> 207.0               | 5                          | 286.0 -> 161.0             | 20                         |
| Bromacil                   | 9.610       | 205.0 -> 188.0               | 15                         | 205.0 -> 162.0             | 15                         |
| Malathion                  | 9.719       | 173.0 -> 99.0                | 15                         | 158.0 -> 125.0             | 10                         |
| Dichlofluanid              | 9.752       | 224.0 -> 123.0               | 10                         | 224.0 -> 77.0              | 45                         |
| Metolachlor                | 9.888       | 238.0 -> 162.0               | 10                         | 238.0 -> 133.0             | 30                         |
| Fenpropimorph              | 9.891       | 128.0 -> 70.0                | 10                         | 128.0 -> 110.0             | 5                          |
| Fenthion                   | 9.910       | 278.0 -> 169.0               | 15                         | 278.0 -> 125.0             | 15                         |
| Cyanazine                  | 9.918       | 225.0 -> 189.0               | 15                         | 225.0 -> 172.0             | 15                         |
| Aldrin                     | 9.934       | 255.0 -> 220.0               | 20                         | 263.0 -> 228.0             | 20                         |
| Anthraquinone              | 9.942       | 208.0 -> 152.0               | 20                         | 180.0 -> 152.0             | 10                         |
| Chlorpyrifos               | 9.949       | 314.0 -> 258.0               | 15                         | 314.0 -> 286.0             | 5                          |
| Flufenacet                 | 9.958       | 211.0 -> 96.0                | 15                         | 211.0 -> 123.0             | 5                          |
| Parathion Ethyl            | 9.961       | 291.0 -> 81.0                | 40                         | 291.0 -> 109.0             | 10                         |
| 4,4'-Dichlorobenzophenone  | 10.031      | 250.0 -> 139.0               | 10                         | 250.0 -> 215.0             | 5                          |
| Chlorthal-dimethyl         | 10.053      | 301.0 -> 223.0               | 25                         | 301.0 -> 273.0             | 15                         |
| Isocarbophos               | 10.066      | 230.0 -> 198.0               | 10                         | 230.0 -> 155.0             | 20                         |
| Butralin                   | 10.214      | 266.0 -> 174.0               | 20                         | 266.0 -> 220.0             | 10                         |
| Pirimiphos Ethyl           | 10.269      | 318.0 -> 166.0               | 10                         | 318.0 -> 182.0             | 10                         |

| Compound                  | RT<br>(min) | Quantification<br>transition | Collision<br>energy<br>(V) | Confirmation<br>transition | Collision<br>energy<br>(V) |
|---------------------------|-------------|------------------------------|----------------------------|----------------------------|----------------------------|
| Bromophos methyl          | 10.280      | 331.0 -> 93.0                | 25                         | 331.0 -> 286.0             | 30                         |
| Fosthiazate               | 10.313      | 195.0 -> 60.0                | 20                         | 195.0 -> 103.0             | 5                          |
| Isofenphos methyl         | 10.391      | 241.0 -> 121.0               | 15                         | 241.0 -> 199.0             | 15                         |
| Cyprodinil                | 10.398      | 224.0 -> 118.0               | 40                         | 224.0 -> 104.0             | 25                         |
| Chlorphenvinfos I         | 10.430      | 267.0 -> 159.0               | 15                         | 323.0 -> 267.0             | 10                         |
| Isodrin                   | 10.448      | 262.8 -> 193.0               | 35                         | 262.8 -> 227.9             | 20                         |
| Pendimethalin             | 10.512      | 252.0 -> 162.0               | 10                         | 252.0 -> 191.0             | 10                         |
| Metazachlor               | 10.514      | 209.0 -> 132.0               | 15                         | 209.0 -> 117.0             | 35                         |
| Terbufos-sulfone          | 10.543      | 199.0 -> 97.0                | 20                         | 264.0 -> 171.0             | 15                         |
| Chlozolate                | 10.558      | 259.0 -> 188.0               | 10                         | 331.0 -> 259.0             | 5                          |
| Heptachlor-epoxide-A-endo | 10.609      | 289.0 -> 219.0               | 30                         | 289.0 -> 253.0             | 10                         |
| Heptachlor-epoxide-B-exo  | 10.613      | 353.0 -> 263.0               | 15                         | 353.0 -> 282.0             | 20                         |
| Oxychlordane              | 10.619      | 385.0 -> 261.0               | 15                         | 385.0 -> 285.0             | 20                         |
| Tolylfluanid              | 10.622      | 238.0 -> 137.0               | 15                         | 238.0 -> 91.0              | 35                         |
| Fluopyram                 | 10.630      | 173.0 -> 95.0                | 35                         | 223.0 -> 196.0             | 18                         |
| Fipronil                  | 10.642      | 367.0 -> 213.0               | 25                         | 367.0 -> 255.0             | 25                         |
| Chlorphenvinfos II        | 10.644      | 267.0 -> 159.0               | 15                         | 323.0 -> 267.0             | 10                         |
| Isofenphos                | 10.646      | 213.0 -> 185.0               | 5                          | 213.0 -> 121.0             | 10                         |
| Mecarbam                  | 10.649      | 296.0 -> 196.0               | 10                         | 329.0 -> 131.0             | 15                         |
| Phenthoate                | 10.719      | 274.0 -> 121.0               | 10                         | 274.0 -> 125.0             | 15                         |
| Dinobuton                 | 10.721      | 211.0 -> 163.0               | 5                          | 211.0 -> 147.0             | 10                         |
| Quinalphos                | 10.724      | 298.0 -> 156.0               | 20                         | 298.0 -> 190.0             | 15                         |
| Captan                    | 10.734      | 149.0 -> 70.0                | 5                          | 151.0 -> 80.0              | 15                         |
| Folpet                    | 10.754      | 260.0 -> 130.0               | 15                         | 260.0 -> 102.0             | 40                         |
| Procymidone               | 10.841      | 283.0 -> 96.0                | 10                         | 283.0 -> 67.0              | 40                         |
| Propaphos                 | 10.945      | 220.0 -> 140.0               | 10                         | 220.0 -> 125.0             | 25                         |
| Bromophos ethyl           | 11.016      | 359.0 -> 303.0               | 15                         | 359.0 -> 331.0             | 5                          |
| Quinomethionate           | 11.036      | 234.0 -> 206.0               | 10                         | 234.0 -> 148.0             | 25                         |
| Chlordane-trans (gamma)   | 11.038      | 373.0 -> 266.0               | 20                         | 373.0 -> 301.0             | 10                         |
| DDE-o,p'                  | 11.074      | 318.0 -> 176.0               | 55                         | 318.0 -> 248.0             | 15                         |
| Tetrachlorvinphos         | 11.137      | 329.0 -> 109.0               | 15                         | 329.0 -> 79.0              | 35                         |
| Disulfoton sulfone        | 11.145      | 213.0 -> 153.0               | 5                          | 213.0 -> 125.0             | 10                         |
| Butachlor                 | 11.192      | 176.0 -> 146.0               | 25                         | 237.0 -> 160.0             | 5                          |
| Endosulfan alfa           | 11.264      | 241.0 -> 206.0               | 16                         | 239.0 -> 204.0             | 16                         |
| Picoxystrobin             | 11.279      | 335.0 -> 173.0               | 10                         | 335.0 -> 303.0             | 10                         |
| Chlordane-cis (alpha)     | 11.295      | 373.0 -> 266.0               | 20                         | 373.0 -> 301.0             | 10                         |
| Flutriafol                | 11.299      | 219.0 -> 123.0               | 15                         | 219.0 -> 95.0              | 35                         |
| Fenamiphos                | 11.303      | 303.0 -> 154.0               | 15                         | 303.0 -> 180.0             | 20                         |
| Nonachlor, trans-         | 11.374      | 406.8 -> 299.8               | 15                         | 406.8 -> 108.8             | 15                         |
| Flutolanil                | 11.376      | 323.0 -> 173.0               | 15                         | 323.0 -> 281.0             | 5                          |
| Napropamide               | 11.395      | 271.0 -> 72.0                | 15                         | 271.0 -> 100.0             | 15                         |

| Compound                | RT<br>(min) | Quantification<br>transition | Collision<br>energy<br>(V) | Confirmation<br>transition | Collision<br>energy<br>(V) |
|-------------------------|-------------|------------------------------|----------------------------|----------------------------|----------------------------|
| Iodofenphos             | 11.460      | 377.0 -> 157.0               | 50                         | 377.0 -> 250.0             | 25                         |
| Isoprothiolane          | 11.480      | 290.0 -> 118.0               | 10                         | 290.0 -> 204.0             | 5                          |
| Prothiofos              | 11.485      | 309.0 -> 239.0               | 15                         | 309.0 -> 221.0             | 30                         |
| Profenofos              | 11.530      | 339.0 -> 269.0               | 15                         | 339.0 -> 251.0             | 35                         |
| Fenthion oxon sulfoxide | 11.562      | 262.0 -> 109.0               | 20                         | 262.0 -> 121.0             | 35                         |
| Fludioxonil             | 11.568      | 248.0 -> 127.0               | 30                         | 248.0 -> 154.0             | 20                         |
| DDE-p,p'                | 11.617      | 318.0 -> 176.0               | 55                         | 318.0 -> 248.0             | 15                         |
| Tricyclazole            | 11.688      | 189.0 -> 162.0               | 10                         | 189.0 -> 135.0             | 20                         |
| Oxyfluorfen             | 11.697      | 300.0 -> 223.0               | 15                         | 361.0 -> 300.0             | 15                         |
| Flamprop-methyl         | 11.715      | 276.0 -> 105.0               | 5                          | 276.0 -> 77.0              | 40                         |
| Dieldrin                | 11.720      | 277.0 -> 240.8               | 5                          | 262.8 -> 227.9             | 20                         |
| Fenthion oxon sulfone   | 11.725      | 294.0 -> 104.0               | 15                         | 294.0 -> 215.0             | 15                         |
| Fipronil sulfone        | 11.746      | 383.0 -> 255.0               | 20                         | 383.0 -> 241.0             | 10                         |
| DDD-o,p'                | 11.779      | 235.0 -> 165.0               | 20                         | 235.0 -> 199.0             | 15                         |
| Bupirimate              | 11.795      | 273.0 -> 193.0               | 5                          | 273.0 -> 108.0             | 15                         |
| Diclobutrazol           | 11.830      | 270.0 -> 159.0               | 15                         | 270.0 -> 201.0             | 10                         |
| Prothioconazol desthio  | 11.912      | 186.0 -> 53.0                | 20                         | 186.0 -> 89.0              | 15                         |
| Fluazifop-butyl         | 11.963      | 383.0 -> 282.0               | 10                         | 383.0 -> 254.0             | 25                         |
| Nitrofen                | 12.010      | 283.0 -> 162.0               | 20                         | 283.0 -> 202.0             | 15                         |
| Chlorfenapyr            | 12.036      | 247.0 -> 227.0               | 15                         | 328.0 -> 247.0             | 15                         |
| Endrin                  | 12.121      | 242.8 -> 173.0               | 30                         | 262.8 -> 227.9             | 20                         |
| Chlorobenzilate         | 12.172      | 251.0 -> 139.0               | 15                         | 251.0 -> 111.0             | 35                         |
| Oxadiargyl              | 12.242      | 213.0 -> 150.0               | 10                         | 340.0 -> 213.0             | 10                         |
| Fensulfothion           | 12.250      | 293.0 -> 97.0                | 30                         | 293.0 -> 125.0             | 10                         |
| Fenthion sulfoxide      | 12.273      | 279.0 -> 138.0               | 15                         | 279.0 -> 125.0             | 25                         |
| Endosulfan beta         | 12.275      | 241.0 -> 206.0               | 16                         | 239.0 -> 204.0             | 16                         |
| Flamprop-Isopropyl      | 12.279      | 276.0 -> 105.0               | 5                          | 276.0 -> 77.0              | 40                         |
| Diniconazole            | 12.314      | 268.0 -> 232.0               | 10                         | 268.0 -> 136.0             | 30                         |
| Etaconazole             | 12.349      | 245.0 -> 173.0               | 15                         | 245.0 -> 191.0             | 10                         |
| Fenthion sulfone        | 12.357      | 310.0 -> 105.0               | 15                         | 310.0 -> 109.0             | 25                         |
| DDD-p,p'                | 12.361      | 235.0 -> 165.0               | 20                         | 235.0 -> 199.0             | 15                         |
| DDT-o,p'                | 12.361      | 235.0 -> 165.0               | 20                         | 235.0 -> 199.0             | 15                         |
| Penthiopyrad            | 12.375      | 302.0 -> 177.0               | 15                         | 302.0 -> 152.0             | 15                         |
| Aclonifen               | 12.396      | 212.0 -> 182.0               | 10                         | 264.0 -> 77.0              | 15                         |
| Ethion                  | 12.413      | 231.0 -> 175.0               | 10                         | 231.0 -> 129.0             | 20                         |
| Oxadixyl                | 12.431      | 163.0 -> 132.0               | 5                          | 233.0 -> 146.0             | 10                         |
| Nonachlor, cis-         | 12.483      | 406.8 -> 299.8               | 15                         | 406.8 -> 108.8             | 15                         |
| Penflufen               | 12.575      | 274.0 -> 141.0               | 18                         | 274.0 -> 60.0              | 58                         |
| Sulprophos              | 12.637      | 322.0 -> 156.0               | 10                         | 322.0 -> 139.0             | 10                         |
| Triazophos              | 12.639      | 257.0 -> 162.0               | 5                          | 257.0 -> 134.0             | 25                         |
| Ofurace                 | 12.798      | 232.0 -> 158.0               | 20                         | 232.0 -> 143.0             | 35                         |

| Compound                    | RT<br>(min) | Quantification<br>transition | Collision<br>energy<br>(V) | Confirmation<br>transition | Collision<br>energy<br>(V) |
|-----------------------------|-------------|------------------------------|----------------------------|----------------------------|----------------------------|
| Carbophenothion             | 12.823      | 342.0 -> 157.0               | 10                         | 199.0 -> 47.0              | 20                         |
| Benalaxyl                   | 12.859      | 266.0 -> 148.0               | 5                          | 234.0 -> 146.0             | 20                         |
| Lenacil                     | 12.958      | 153.0 -> 136.0               | 15                         | 153.0 -> 110.0             | 15                         |
| Phosmet oxon                | 13.008      | 160.0 -> 51.0                | 40                         | 160.0 -> 133.0             | 15                         |
| Endosulfan sulfate          | 13.022      | 270.0 -> 235.0               | 15                         | 387.0 -> 289.0             | 5                          |
| Fluopicolide                | 13.089      | 347.0 -> 172.0               | 28                         | 347.0 -> 176.0             | 15                         |
| Dicofol 4,4'-               | 13.217      | 251.0 -> 139.0               | 15                         | 251.0 -> 111.0             | 35                         |
| DDT-p,p'                    | 13.223      | 235.0 -> 165.0               | 20                         | 235.0 -> 199.0             | 15                         |
| Methoxychlor deg            | 13.263      | 227.0 -> 169.0               | 25                         | 227.0 -> 141.0             | 40                         |
| Diclofop-methyl             | 13.266      | 340.0 -> 253.0               | 10                         | 340.0 -> 184.0             | 30                         |
| Nuarimol                    | 13.291      | 235.0 -> 139.0               | 15                         | 235.0 -> 111.0             | 40                         |
| TPP                         | 13.352      | 325.0 -> 169.0               | 20                         | 325.0 -> 231.0             | 20                         |
| Piperonylbutoxide           | 13.361      | 176.0 -> 131.0               | 15                         | 176.0 -> 117.0             | 20                         |
| Resmethrin                  | 13.361      | 171.0 -> 143.0               | 5                          | 171.0 -> 128.0             | 15                         |
| Proquinazid                 | 13.370      | 288.0 -> 245.0               | 15                         | 288.0 -> 217.0             | 25                         |
| Fluotrimazole               | 13.482      | 311.0 -> 165.0               | 15                         | 311.0 -> 233.0             | 15                         |
| Fenamiphos sulfoxide        | 13.670      | 304.0 -> 196.0               | 5                          | 304.0 -> 122.0             | 15                         |
| Iprodione                   | 13.698      | 314.0 -> 56.0                | 20                         | 314.0 -> 245.0             | 10                         |
| Spiromesifen                | 13.699      | 272.0 -> 254.0               | 5                          | 272.0 -> 209.0             | 10                         |
| Fenamiphos sulfone          | 13.755      | 320.0 -> 292.0               | 10                         | 292.0 -> 213.0             | 10                         |
| Pyridaphenthion             | 13.794      | 340.0 -> 199.0               | 5                          | 340.0 -> 203.0             | 30                         |
| Carbosulfan                 | 13.827      | 160.0 -> 104.0               | 10                         | 160.0 -> 62.0              | 20                         |
| Tetramethrin                | 13.861      | 164.0 -> 77.0                | 25                         | 164.0 -> 135.0             | 15                         |
| Bifenthrin                  | 13.895      | 181.0 -> 165.0               | 25                         | 181.0 -> 115.0             | 55                         |
| Phosmet                     | 13.902      | 160.0 -> 77.0                | 20                         | 160.0 -> 133.0             | 10                         |
| Bromopropylate              | 13.914      | 341.0 -> 183.0               | 20                         | 341.0 -> 157.0             | 45                         |
| EPN                         | 13.943      | 157.0 -> 63.0                | 10                         | 157.0 -> 110.0             | 15                         |
| Picolinafen                 | 13.943      | 376.0 -> 238.0               | 20                         | 376.0 -> 239.0             | 10                         |
| Bifenazate                  | 13.945      | 258.0 -> 199.0               | 10                         | 300.0 -> 258.0             | 5                          |
| Methoxychlor                | 14.015      | 227.0 -> 169.0               | 25                         | 227.0 -> 141.0             | 40                         |
| Fenpropathrin               | 14.027      | 208.0 -> 181.0               | 5                          | 265.0 -> 210.0             | 10                         |
| Etoxazol                    | 14.065      | 300.0 -> 270.0               | 20                         | 204.0 -> 146.0             | 30                         |
| Fenamidone                  | 14.140      | 268.0 -> 180.0               | 20                         | 238.0 -> 103.0             | 15                         |
| Fenazaquin                  | 14.194      | 160.0 -> 145.0               | 5                          | 160.0 -> 117.0             | 20                         |
| Bifenox                     | 14.207      | 341.0 -> 189.0               | 20                         | 341.0 -> 310.0             | 10                         |
| Metconazol                  | 14.237      | 250.0 -> 125.0               | 10                         | 250.0 -> 215.0             | 15                         |
| Fenothrin                   | 14.352      | 183.0 -> 165.0               | 10                         | 183.0 -> 153.0             | 15                         |
| Tetradifon                  | 14.411      | 354.0 -> 159.0               | 10                         | 354.0 -> 227.0             | 10                         |
| Phosalone                   | 14.568      | 367.0 -> 182.0               | 5                          | 367.0 -> 111.0             | 35                         |
| Benthiavalicarb-isopropyl I | 14.601      | 180.0 -> 83.0                | 30                         | 180.0 -> 127.0             | 20                         |
| Leptophos                   | 14.630      | 171.0 -> 77.0                | 15                         | 377.0 -> 269.0             | 20                         |

| Compound                     | RT<br>(min) | Quantification<br>transition | Collision<br>energy<br>(V) | Confirmation<br>transition | Collision<br>energy<br>(V) |
|------------------------------|-------------|------------------------------|----------------------------|----------------------------|----------------------------|
| Lambda-Cyhalothrin I         | 14.668      | 197.0 -> 161.0               | 5                          | 208.0 -> 181.0             | 5                          |
| Cyhalofop-butyl              | 14.676      | 357.0 -> 229.0               | 15                         | 357.0 -> 256.0             | 10                         |
| Benthiavalecarb-isopropyl II | 14.815      | 180.0 -> 83.0                | 30                         | 180.0 -> 127.0             | 20                         |
| Lambda-Cyhalothrin II        | 14.859      | 197.0 -> 161.0               | 5                          | 208.0 -> 181.0             | 5                          |
| Mirex                        | 14.869      | 272.0 -> 237.0               | 15                         | 237.0 -> 143.0             | 30                         |
| Acrinathrin I                | 14.874      | 289.0 -> 93.0                | 10                         | 247.0 -> 68.0              | 30                         |
| Acrinathrin II               | 14.997      | 289.0 -> 93.0                | 10                         | 247.0 -> 68.0              | 30                         |
| Fenarimol                    | 15.087      | 330.0 -> 139.0               | 5                          | 330.0 -> 111.0             | 50                         |
| Pyrazophos                   | 15.116      | 265.0 -> 210.0               | 10                         | 373.0 -> 210.0             | 15                         |
| Azinphos-ethyl               | 15.208      | 160.0 -> 77.0                | 20                         | 160.0 -> 132.0             | 0                          |
| Metrafenone                  | 15.327      | 393.0 -> 363.0               | 15                         | 393.0 -> 349.0             | 20                         |
| Isoprazam                    | 15.328      | 303.0 -> 159.0               | 28                         | 303.0 -> 262.0             | 20                         |
| Spirodiclofen                | 15.642      | 312.0 -> 109.0               | 15                         | 312.0 -> 259.0             | 10                         |
| Permethrin                   | 15.689      | 163.0 -> 127.0               | 5                          | 165.0 -> 127.0             | 5                          |
| Pyridaben                    | 15.760      | 309.0 -> 147.0               | 15                         | 309.0 -> 132.0             | 40                         |
| Fluquinconazole              | 15.847      | 340.0 -> 298.0               | 15                         | 340.0 -> 286.0             | 25                         |
| Coumaphos                    | 15.863      | 362.0 -> 109.0               | 15                         | 362.0 -> 226.0             | 18                         |
| Cyfluthrin                   | 16.272      | 226.0 -> 206.0               | 15                         | 199.0 -> 170.0             | 30                         |
| Halfenprox                   | 16.536      | 263.0 -> 129.0               | 45                         | 263.0 -> 115.0             | 20                         |
| Cypermethrin                 | 16.584      | 163.0 -> 127.0               | 5                          | 165.0 -> 127.0             | 5                          |
| Quizalafop ethyl             | 16.653      | 372.0 -> 299.0               | 10                         | 372.0 -> 244.0             | 25                         |
| Flucythrinate I              | 16.678      | 199.0 -> 107.0               | 25                         | 451.0 -> 225.0             | 5                          |
| Pyridalyl                    | 16.795      | 204.0 -> 148.0               | 20                         | 204.0 -> 146.0             | 30                         |
| Flucythrinate II             | 16.862      | 199.0 -> 107.0               | 25                         | 451.0 -> 225.0             | 5                          |
| Fenvalerate                  | 17.388      | 167.0 -> 125.0               | 5                          | 225.0 -> 147.0             | 15                         |
| Fluvalinate tau              | 17.574      | 250.0 -> 55.0                | 15                         | 250.0 -> 200.0             | 15                         |
| Esfenvalerate                | 17.583      | 167.0 -> 125.0               | 5                          | 225.0 -> 147.0             | 15                         |
| Deltamethrin I               | 17.897      | 251.0 -> 172.0               | 5                          | 172.0 -> 93.0              | 10                         |
| Deltamethrin II              | 18.104      | 251.0 -> 172.0               | 5                          | 172.0 -> 93.0              | 10                         |

**Table S2.** List of Compounds Included in the LC-MS/MS method together with their Retention Times (RT), quantification and confirmation transitions, capillary voltage, and collision energies.

| Compound      | RT (min) | Polarity | Capillary<br>voltage<br>(V) | Quantification<br>transition | Collision<br>energy | Confirmation<br>transition | Collision<br>energy |
|---------------|----------|----------|-----------------------------|------------------------------|---------------------|----------------------------|---------------------|
| Methamidophos | 3.22     | Positive | 44                          | 142 > 94                     | 10.5                | 142 > 125                  | 11.5                |
| Pymetrozine   | 3.22     | Positive | 52                          | 218 > 105                    | 15                  | 218 > 218                  | 6.5                 |
| Formetanate   | 3.25     | Positive | 48                          | 222 > 165                    | 13                  | 222 > 222                  | 5                   |
| Acephate      | 3.28     | Positive | 30                          | 201 > 143                    | 9.5                 | 201 > 184                  | 5                   |

| Compound                                | RT (min) | Polarity | Capillary voltage (V) | Quantification transition |   |       | Collision energy | Confirmation transition |   |       | Collision energy |
|-----------------------------------------|----------|----------|-----------------------|---------------------------|---|-------|------------------|-------------------------|---|-------|------------------|
| Omethoate                               | 3.34     | Positive | 36                    | 214                       | > | 125   | 19               | 214                     | > | 183   | 9.5              |
| Aldicarb sulfoxide                      | 3.37     | Positive | 32                    | 207                       | > | 132   | 4.5              | 207                     | > | 89    | 10               |
| Propamocarb                             | 3.38     | Positive | 48                    | 189                       | > | 102   | 13.5             | 189                     | > | 144   | 9.5              |
| Oxamyl                                  | 3.41     | Positive | 30                    | 237                       | > | 72    | 5.5              | 237                     | > | 90    | 5                |
| Aldicarb sulfone                        | 3.41     | Positive | 30                    | 240                       | > | 86    | 4.5              | 240                     | > | 75.9  | 9                |
| Oxydemeton-methyl                       | 3.48     | Positive | 32                    | 247                       | > | 109   | 23.5             | 247                     | > | 169   | 12               |
| Demeton-S-methylsulfone                 | 3.52     | Positive | 48                    | 263                       | > | 121   | 12               | 263                     | > | 169   | 13.5             |
| Methomyl                                | 3.55     | Positive | 32                    | 163                       | > | 88    | 5                | 163                     | > | 106   | 6                |
| Thiamethoxam                            | 3.56     | Positive | 52                    | 292                       | > | 211   | 9.5              | 292                     | > | 132   | 15.5             |
| Monocrotophos                           | 3.57     | Positive | 32                    | 224                       | > | 193   | 6.5              | 224                     | > | 127   | 12               |
| Carbendazim                             | 3.59     | Positive | 68                    | 192                       | > | 132   | 25.5             | 192                     | > | 160   | 14               |
| Flonicamid                              | 3.60     | Negative | 40                    | 228                       | > | 81    | 10               | 228                     | > | 228   | 5                |
| Spirotetramat enol-glucoside            | 3.62     | Positive | 60                    | 464                       | > | 302   | 12               | 464                     | > | 216.1 | 42               |
| Dimethylphenil-N-methylformanidina DMPF | 3.65     | Positive | 44                    | 163                       | > | 122   | 11.5             | 163                     | > | 107   | 19.5             |
| Metiocarb sulfone                       | 3.69     | Positive | 30                    | 275                       | > | 122   | 14.5             | 275                     | > | 107   | 7                |
| Metiocarb sulfoxide                     | 3.73     | Positive | 30                    | 242                       | > | 185   | 4.5              | 242                     | > | 122.1 | 23               |
| Imidacloprid                            | 3.73     | Positive | 52                    | 256                       | > | 175   | 16.5             | 256                     | > | 209   | 13.5             |
| Thiabendazole                           | 3.75     | Positive | 68                    | 202                       | > | 131   | 27               | 202                     | > | 175   | 19.5             |
| Vamidothion                             | 3.83     | Positive | 30                    | 288                       | > | 118   | 18.5             | 288                     | > | 146   | 8.5              |
| Acetamiprid                             | 3.86     | Positive | 32                    | 223                       | > | 90    | 29               | 223                     | > | 126   | 17               |
| 3-OH carbofuran                         | 3.87     | Positive | 52                    | 238                       | > | 163   | 12.5             | 238                     | > | 219.9 | 4.5              |
| Trichlorfon                             | 3.89     | Positive | 30                    | 274                       | > | 109   | 15.5             | 274                     | > | 257   | 6.5              |
| Clothianidin                            | 3.78     | Positive | 40                    | 250                       | > | 169   | 11               | 250                     | > | 132   | 13               |
| Dimethoate                              | 3.95     | Positive | 30                    | 230                       | > | 125   | 19               | 230                     | > | 171   | 14               |
| Thiacloprid                             | 4.02     | Positive | 52                    | 253                       | > | 90    | 30               | 253                     | > | 126   | 17               |
| Sulfoxaflor                             | 4.03     | Positive | 60                    | 278                       | > | 174   | 8                | 278                     | > | 278   | 5                |
| Cymoxanil                               | 4.13     | Positive | 30                    | 199                       | > | 128   | 6                | 199                     | > | 111.2 | 16               |
| Ethirimol                               | 4.42     | Positive | 68                    | 210                       | > | 140   | 19.5             | 210                     | > | 98.1  | 25.5             |
| Aldicarb                                | 4.44     | Positive | 30                    | 208                       | > | 89    | 10.5             | 208                     | > | 116   | 5                |
| Spirotetramat mono hydroxy              | 4.67     | Positive | 60                    | 304                       | > | 254   | 15               | 304                     | > | 211.1 | 22               |
| Thiophanate-methyl                      | 4.70     | Positive | 44                    | 343                       | > | 151   | 15.5             | 343                     | > | 311   | 8                |
| Propoxur                                | 4.84     | Positive | 30                    | 210                       | > | 93    | 24               | 210                     | > | 111   | 12               |
| Carofurano                              | 4.86     | Positive | 40                    | 222                       | > | 137   | 17               | 222                     | > | 165   | 9.5              |
| Thiodicarb                              | 5.05     | Positive | 30                    | 355                       | > | 88    | 8.5              | 355                     | > | 108   | 11.5             |
| Carbaryl                                | 5.13     | Positive | 30                    | 202                       | > | 117   | 19.5             | 202                     | > | 145   | 7                |
| Carboxin                                | 5.13     | Positive | 36                    | 236                       | > | 143   | 11               | 236                     | > | 93    | 27.5             |
| Spirotetramat cis enol                  | 5.34     | Positive | 60                    | 302                       | > | 216   | 30               | 302                     | > | 270   | 20               |
| Imazalil                                | 5.46     | Positive | 76                    | 297                       | > | 159   | 18               | 297                     | > | 201   | 15.5             |
| Metalaxyl                               | 5.86     | Positive | 44                    | 280                       | > | 220   | 12.5             | 280                     | > | 248   | 8.5              |
| Spirotetramat cis keto hydroxy          | 6.09     | Positive | 60                    | 318                       | > | 214   | 25               | 318                     | > | 300.3 | 4                |
| Chlorantraniliprole                     | 6.26     | Positive | 52                    | 484                       | > | 285.6 | 10.5             | 484                     | > | 484   | 5                |



| Compound               | RT (min)   | Polarity | Capillary voltage (V) | Quantification transition |   |       | Collision energy | Confirmation transition |   |       | Collision energy |
|------------------------|------------|----------|-----------------------|---------------------------|---|-------|------------------|-------------------------|---|-------|------------------|
| Methidathion           | 6.27       | Positive | 48                    | 303                       | > | 85    | 15.5             | 303                     | > | 145   | 7                |
| Azinphos methyl        | 6.37       | Positive | 30                    | 318                       | > | 132   | 11.5             | 318                     | > | 160   | 6.5              |
| Azoxystrobin           | 6.67       | Positive | 30                    | 404                       | > | 344   | 21               | 404                     | > | 372   | 15               |
| Diethofencarb          | 6.87       | Positive | 32                    | 268                       | > | 180   | 16               | 268                     | > | 226   | 8.5              |
| Dimethomorph           | 7.07; 7.79 | Positive | 44                    | 388                       | > | 301   | 15               | 388                     | > | 165   | 29.5             |
| Linuron                | 7.18       | Positive | 40                    | 249                       | > | 160   | 14.5             | 249                     | > | 182   | 11.5             |
| Methiocarb             | 7.34       | Positive | 32                    | 226                       | > | 121   | 15.5             | 226                     | > | 169   | 8                |
| Triflusalufuron methyl | 7.36       | Positive | 44                    | 493                       | > | 264   | 18.5             | 493.4                   | > | 461   | 9.5              |
| Mandipropamid          | 7.46       | Positive | 52                    | 413                       | > | 328.3 | 11.5             | 413                     | > | 356.3 | 7                |
| Fludioxonil            | 7.57       | Negative | -72                   | 247                       | > | 126   | 30.5             | 247                     | > | 180   | 26               |
| Boscalid               | 7.46       | Positive | 72                    | 343                       | > | 307   | 15.5             | 343                     | > | 271   | 27.5             |
| Malathion              | 8.16       | Positive | 105                   | 331                       | > | 99    | 18               | 331                     | > | 127   | 10               |
| Paclobutrazol          | 7.68       | Positive | 48                    | 295                       | > | 70    | 13               | 295                     | > | 125   | 30.5             |
| Metoxifenocide         | 7.77       | Positive | 30                    | 369                       | > | 149   | 15.5             | 369                     | > | 313   | 7                |
| Fluxapyroxad           | 7.90       | Negative | -60                   | 380                       | > | 248   | 14               | 380                     | > | 131   | 12               |
| Propyzamide            | 7.97       | Positive | 48                    | 256                       | > | 173   | 21               | 256                     | > | 190   | 13               |
| Cyproconazole          | 8.01; 8.54 | Positive | 64                    | 292                       | > | 70    | 13               | 292                     | > | 125   | 26.5             |
| Triadimefon            | 7.397      | Positive | 60                    | 294                       | > | 69    | 18               | 294                     | > | 197   | 14               |
| Fenpyrazamine          | 8.08       | Positive | 60                    | 332                       | > | 70    | 15               | 332                     | > | 272   | 15               |
| Myclobutanil           | 8.16       | Positive | 68                    | 289                       | > | 70    | 9.5              | 289                     | > | 125   | 27.5             |
| Bromuconazole          | 8.23;9.58  | Positive | 89                    | 378                       | > | 159   | 17.5             | 377.9                   | > | 161   | 18.5             |
| Mepanipyrim            | 8.40       | Positive | 68                    | 224                       | > | 224   | 9.5              | 224                     | > | 105.5 | 27.5             |
| Iprovalicarb           | 8.41       | Positive | 32                    | 321                       | > | 119   | 14               | 321                     | > | 203   | 7                |
| Spirotetramat          | 8.43       | Positive | 60                    | 374                       | > | 330   | 8                | 374                     | > | 302   | 10               |
| Triadimenol            | 8.56       | Positive | 30                    | 296                       | > | 70    | 7                | 296                     | > | 99    | 11.5             |
| Fenhexamid             | 8.65       | Positive | 64                    | 302                       | > | 55    | 26.5             | 302                     | > | 97    | 18.5             |
| Triticonazole          | 8.74       | Positive | 60                    | 318                       | > | 70    | 12               | 318                     | > | 125   | 30.5             |
| Diclofluanid           | 8.79       | Positive | 68                    | 333                       | > | 224   | 9.5              | 333                     | > | 123   | 22.5             |
| Tetraconazole          | 8.86       | Positive | 72                    | 373                       | > | 70    | 22.5             | 373                     | > | 159.3 | 24.5             |
| Epoxiconazole          | 8.88       | Positive | 40                    | 330                       | > | 121   | 18               | 330                     | > | 101   | 37.5             |
| Cyazofamid             | 8.97       | Positive | 50                    | 325                       | > | 108   | 9.5              | 325                     | > | 261   | 6.5              |
| Rotenone               | 9.13       | Positive | 40                    | 395                       | > | 192   | 21.5             | 395                     | > | 213   | 20.5             |
| Fenbuconazole          | 9.17       | Positive | 68                    | 337                       | > | 70    | 13,5             | 337                     | > | 125   | 22.5             |
| Tebufenocide           | 9.26       | Positive | 32                    | 353                       | > | 133   | 16,5             | 353                     | > | 297   | 7                |
| Flusilazole            | 9.32       | Positive | 44                    | 316                       | > | 165   | 24.5             | 316                     | > | 247   | 15.5             |
| Diflubenzuron          | 9.37       | Positive | 30                    | 311                       | > | 158   | 8                | 311                     | > | 141   | 25               |
| Fenoxycarb             | 9.39       | Positive | 30                    | 302                       | > | 88    | 15               | 302                     | > | 116   | 7                |
| Kresoxim-methyl        | 9.55       | Positive | 40                    | 314                       | > | 116   | 9.5              | 314                     | > | 206   | 6                |
| Bixafen                | 9.58       | Positive | 60                    | 414                       | > | 394   | 8                | 414                     | > | 266   | 15               |
| Cyflufenamid           | 9.72;10.31 | Positive | 50                    | 413                       | > | 295   | 12               | 413                     | > | 203   | 25               |
| Tolyfluanide           | 9.97       | Positive | 30                    | 364                       | > | 238   | 13               | 364                     | > | 137   | 23.5             |
| Penconazole            | 9.75       | Positive | 64                    | 284                       | > | 70    | 10.5             | 284                     | > | 159   | 27.5             |
| Tebuconazole           | 9.88       | Positive | 60                    | 308                       | > | 70    | 13               | 308                     | > | 125   | 32               |

| Compound              | RT (min)    | Polarity | Capillary voltage (V) | Quantification transition |   |       | Collision energy | Confirmation transition |   |       | Collision energy |
|-----------------------|-------------|----------|-----------------------|---------------------------|---|-------|------------------|-------------------------|---|-------|------------------|
| TPP                   | 10.03       | Positive | 76                    | 327                       | > | 152   | 16.5             | 327                     | > | 215   | 20               |
| Prochloraz            | 10.09       | Positive | 32                    | 376                       | > | 70    | 18               | 376                     | > | 308   | 10.5             |
| Zoxamide              | 10.11       | Positive | 55                    | 336                       | > | 187   | 17               | 336                     | > | 159   | 36.5             |
| Propiconazole         | 10.11       | Positive | 76                    | 342                       | > | 69    | 13               | 342                     | > | 159   | 26               |
| Famoxadone            | 10.16       | Positive | 40                    | 392                       | > | 238   | 16               | 392                     | > | 331   | 7.5              |
| Pyraclostrobin        | 10.21       | Positive | 30                    | 388                       | > | 194   | 10               | 388                     | > | 163   | 21.5             |
| Hexaconazole          | 10.32       | Positive | 68                    | 314                       | > | 70    | 11               | 314                     | > | 159   | 26               |
| Spinosyn A            | 10.41       | Positive | 40                    | 733                       | > | 142   | 25.5             | 733                     | > | 733   | 8.5              |
| Triflumuron           | 10.41       | Negative | -48                   | 357                       | > | 154   | 11               | 357                     | > | 175.8 | 21               |
| Clofentezine          | 10.42       | Positive | 36                    | 303                       | > | 138   | 11.5             | 303                     | > | 102.1 | 30               |
| Bitertanol            | 10.47       | Positive | 42                    | 338                       | > | 70    | 5                | 338                     | > | 99    | 10.5             |
| Pencycuron            | 10.57       | Positive | 44                    | 329                       | > | 125   | 21               | 329                     | > | 329   | 6                |
| Dodine                | 10.59       | Positive | 44                    | 228                       | > | 60    | 16.5             | 228                     | > | 186   | 15.5             |
| Ametoctradin          | 10.78       | Positive | 60                    | 276                       | > | 176   | 30               | 276                     | > | 149   | 38               |
| Tebufenpyrad          | 11.65       | Positive | 88                    | 334                       | > | 96    | 26               | 334                     | > | 185   | 21               |
| Tolclofos-methyl      | 10.93       | Positive | 43                    | 301                       | > | 269   | 12.5             | 300.7                   | > | 125   | 22               |
| Indoxacarb            | 10.92       | Positive | 44                    | 528                       | > | 150   | 23.5             | 528                     | > | 218   | 22               |
| Trifloxystrobin       | 10.92       | Positive | 30                    | 409                       | > | 186   | 16               | 409                     | > | 206   | 12               |
| Difenoconazole        | 10.89       | Positive | 52                    | 407                       | > | 251   | 19               | 407                     | > | 337   | 10               |
| Spinosyn D            | 11.07       | Positive | 32                    | 747                       | > | 142   | 26               | 747                     | > | 98    | 9.5              |
| Spinetoram I          | 11.07       | Positive | 50                    | 749                       | > | 142   | 28               | 748.5                   | > | 748.5 | 5                |
| Metaflumizone         | 11.07;11.83 | Positive | 60                    | 507                       | > | 178   | 24               | 507                     | > | 287   | 24               |
| Benfuracarb           | 11.28       | Positive | 48                    | 411                       | > | 195   | 22               | 411                     | > | 252.1 | 12               |
| Novaluron             | 11.29;12.73 | Positive | 50                    | 493                       | > | 158   | 12               | 493                     | > | 141   | 22               |
| Tebufenpyrad          | 11.65       | Positive | 88                    | 334                       | > | 117   | 25               | 334                     | > | 145   | 21               |
| Spinetoran II         | 11.68       | Positive | 65                    | 761                       | > | 142   | 24               | 760.5                   | > | 98    | 50               |
| Pyriproxyfen          | 12.06       | Positive | 44                    | 322                       | > | 96    | 11.5             | 322                     | > | 185   | 21.5             |
| Lufenuron             | 12.09       | Negative | -30                   | 510                       | > | 326   | 16.5             | 510                     | > | 339   | 10               |
| Eamectin benzoate B1a | 12.10       | Positive | 88                    | 887                       | > | 158   | 29.5             | 887                     | > | 887   | 8                |
| Teflubenzuron         | 12.14       | Negative | -44                   | 379                       | > | 339   | 8                | 379                     | > | 359   | 5                |
| Quinoxifen            | 12.20       | Positive | 92                    | 308                       | > | 162.1 | 28.5             | 308                     | > | 197   | 25.5             |
| Hexythiazox           | 12.26       | Positive | 48                    | 353                       | > | 228   | 13               | 353                     | > | 168   | 23               |
| Buprofezin            | 12.52       | Positive | 70                    | 306                       | > | 116   | 14               | 306                     | > | 201   | 8                |
| Spiromesifen          | 12.59       | Positive | 60                    | 371.5                     | > | 273.4 | 9.5              | 371.5                   | > | 255   | 21               |
| Propargite            | 12.58       | Positive | 32                    | 368                       | > | 175   | 15               | 368                     | > | 231   | 9.5              |
| Flufenoxuron          | 12.73       | Negative | -40                   | 487                       | > | 156   | 14               | 487                     | > | 411   | 11               |
| Fenpyroximate         | 12.85       | Positive | 48                    | 422                       | > | 138   | 13               | 422                     | > | 366   | 23               |
| Amitraz               | 12.94       | Positive | 44                    | 294                       | > | 163   | 13               | 294.1                   | > | 122   | 24               |
| Clorflurazon          | 13.18       | Positive | 44                    | 540                       | > | 383   | 17               | 540                     | > | 158.1 | 19.5             |
| Abamectin             | 14.07       | Positive | 44                    | 891                       | > | 305   | 25.5             | 890.5                   | > | 567   | 11.5             |
| Etofenprox            | 14.86       | Positive | 44                    | 394                       | > | 135   | 23.5             | 394                     | > | 177   | 13               |
| Fenbutatin oxide      | 16.41       | Positive | 104                   | 519                       | > | 197   | 45               | 519                     | > | 288.8 | 31               |
